# Supplementary material
Source: HighWire-hosted journal article supplement (doi:10.1136/heartjnl-2015-307845)
Supplement: heartjnl-2015-307845.index.pdf [file heartjnl-2015-307845.index.pdf]

*The number next to the author indicates the page number, not the abstract number.*

- Abdel-Gadir A, A16  
 Ahmed N, A2, A3, A4, A17  
 Akbar S, A1  
 Alexander J, A1  
 Amadu AM, A1
- Baritussio A, A1, A2, A4, A17  
 Baumbach A, A4  
 Belch JF, A17  
 Berry C, A2, A3, A4, A5, A13, A14, A15, A16  
 Blackman D, A10  
 Broadbent DA, A11  
 Bucciarelli-Ducci C, A1, A2, A4, A17  
 Bulluck H, A16
- Carberry J, A2, A3, A4  
 Carpenter A, A4, A17  
 Carrick D, A2, A3, A4, A5, A13, A14, A15, A16  
 Carrick DJA, A4  
 Castelletti S, A16  
 Chamley R, A14  
 Clerfond G, A5, A13, A14, A15, A16  
 Clift P, A9  
 Cole B, A7  
 Cole BR, A6  
 Corcoran D, A4, A5, A13, A14  
 Corrado D, A2  
 Curzen N, A10
- d'Arcy J, A14  
 Dalby M, A10  
 Dastidar AG, A1, A2, A4, A17  
 Davie A, A2, A3  
 Dixon LJ, A6, A7  
 Dobson LE, A7, A8, A12  
 Douglas H, A6, A7
- Erhayiem B, A7, A8, A11, A12  
 Eteiba H, A2, A3, A4
- Fairbairn TA, A12  
 Flather M, A10  
 Foley JRJ, A7  
 Fontana M, A16  
 Ford I, A2, A3
- Gandy SJ, A17  
 Garg P, A7, A8, A12  
 Gershlick AH, A9, A10
- Greenwood JP, A7, A8, A9, A10, A11, A12
- Haaf P, A8  
 Haig C, A2, A3, A4  
 Hall Barrientos P, A5, A15, A16  
 Hamilton M, A1  
 Hamilton-Baillie A, A9  
 Harbinson M, A6, A7  
 Hetherington S, A10  
 Hood S, A2, A3  
 Horan P, A6, A7  
 Houston JG, A17
- Johnston N, A6, A7  
 Jones CM, A9
- Kamaruddin H, A1  
 Kellman P, A16  
 Kelly DJ, A10  
 Khan JN, A9, A10  
 Kidambi A, A7, A8, A11, A12
- Lawton C, A4  
 Lawton CB, A17  
 Lee E, A1  
 Lindsay M, A2, A3, A4
- Maestrini V, A16  
 Mahrous A, A2, A3  
 Manghat N, A1  
 Mangion K, A4, A5, A13, A14, A15, A16  
 Manisty C, A16  
 Mathew T, A1  
 McAlindon E, A17  
 McCann G, A12  
 McCann GP, A9, A10, A14  
 McClure J, A5, A13, A14, A16  
 McComb C, A5, A13, A14, A15, A16  
 McDiarmid AK, A7, A8, A11, A12  
 McEntegart M, A2, A3, A4  
 Moon JC, A16  
 Mordi I, A2, A3  
 Motwani M, A11, A12  
 Musa TA, A7, A8, A11, A12
- Nasis A, A16  
 Nazir SA, A9, A10  
 Nicol ED, A14  
 Nightingale A, A4
- Oldroyd KG, A2, A3, A4
- Packer C, A9  
 Palazzuoli A, A4  
 Parasa R, A1  
 Parsons IT, A14  
 Peebles C, A9, A10  
 Perazzolo Marra M, A2  
 Petrie M, A2, A3  
 Piechnik SK, A16  
 Plein S, A7, A8, A11, A12
- Radjenovic A, A2, A3, A4, A5, A13, A14, A15, A16  
 Ramkumar PG, A17  
 Rauhalaami S, A15, A16  
 Rauhalaami SM, A2, A3, A4, A5, A13, A14  
 Ring A, A10  
 Ripley DP, A7, A8, A11, A12, A14  
 Robson MD, A16  
 Rodrigues J, A1, A2, A4, A17  
 Rosmini S, A16
- Sado DM, A14  
 Schelbert EB, A16  
 Simpson J, A16  
 Singh A, A9  
 Soong CM, A6, A7  
 Sourbron S, A12  
 Steadman C, A12  
 Struthers AD, A17  
 Susana A, A2  
 Swanton H, A10  
 Swoboda P, A12  
 Swoboda PP, A7, A8, A11
- Toogood A, A9  
 Townsend M, A4  
 Treibel TA, A16
- Uddin A, A11, A12
- Watkins S, A2, A3, A4  
 Weir-McCall JR, A17  
 White RD, A17  
 White SK, A16  
 Wilson C, A4, A17  
 Wong J, A9, A10
- Zorzi A, A2
